# Supplementary material for: Plantlet Anatomy of Silver Birch (Betula pendula Roth.) and Hybrid Aspen (Populus tremuloides Michx. × Populus tremula L.) Shows Intraspecific Reactions to Illumination In Vitro
Source: MDPI journal article supplement (doi:10.3390/plants11081097), 2022-04-18
Supplement: s1 [file s1]

Table S1

**Overall mean ( $\pm$  standard deviation) values of stomata parameters, chloroplast count, leaf thickness and stem anatomical parameters of silver birch and hybrid aspen *in vitro* cultures grown under different spectral compositions.**

| <b>Silver birch</b>                             | <b>FL</b>                    | <b>RGBYO</b>                 | <b>RB</b>                     | <b>RGB</b>                   |
|-------------------------------------------------|------------------------------|------------------------------|-------------------------------|------------------------------|
| stomata, count per mm <sup>2</sup>              | 315 $\pm$ 88 <sup>b</sup>    | 372 $\pm$ 54 <sup>a</sup>    | 294 $\pm$ 54 <sup>b</sup>     | 322 $\pm$ 89 <sup>b</sup>    |
| length of stomata, $\mu$ m                      | 33.2 $\pm$ 4.6 <sup>a</sup>  | 32.3 $\pm$ 5.7 <sup>a</sup>  | 32.0 $\pm$ 5.2 <sup>a</sup>   | 32.8 $\pm$ 5.1 <sup>a</sup>  |
| width of stomata, $\mu$ m                       | 10.8 $\pm$ 1.6 <sup>a</sup>  | 10.8 $\pm$ 1.7 <sup>a</sup>  | 10.9 $\pm$ 1.6 <sup>a</sup>   | 11.1 $\pm$ 1.5 <sup>a</sup>  |
| chloroplasts, count                             | 8.2 $\pm$ 1.9 <sup>a</sup>   | 8.5 $\pm$ 1.7 <sup>a</sup>   | 8.1 $\pm$ 1.6 <sup>a</sup>    | 8.1 $\pm$ 1.7 <sup>a</sup>   |
| leaf thickness, $\mu$ m                         | 91.8 $\pm$ 12.8 <sup>a</sup> | 92.8 $\pm$ 12.8 <sup>a</sup> | 91.5 $\pm$ 11.6 <sup>a</sup>  | 95.7 $\pm$ 13.6 <sup>a</sup> |
| stem radius, $\mu$ m                            | 325 $\pm$ 75 <sup>a</sup>    | 334 $\pm$ 65 <sup>a</sup>    | 329 $\pm$ 87 <sup>a</sup>     | 336 $\pm$ 87 <sup>a</sup>    |
| xylem width, $\mu$ m                            | 81.3 $\pm$ 25.1 <sup>a</sup> | 84.8 $\pm$ 25.5 <sup>a</sup> | 92.8 $\pm$ 40.9 <sup>a</sup>  | 89.4 $\pm$ 40.9 <sup>a</sup> |
| phloem width, $\mu$ m                           | 15.9 $\pm$ 3.3 <sup>ab</sup> | 14.9 $\pm$ 2.9 <sup>ab</sup> | 16.8 $\pm$ 5.7 <sup>a</sup>   | 16.7 $\pm$ 4.9 <sup>a</sup>  |
| secondary xylem cell wall<br>thickness, $\mu$ m | 1.13 $\pm$ 0.22 <sup>a</sup> | 1.14 $\pm$ 0.24 <sup>a</sup> | 1.10 $\pm$ 0.20 <sup>ab</sup> | 1.01 $\pm$ 0.23 <sup>b</sup> |
| <b>Hybrid aspen</b>                             | <b>FL</b>                    | <b>RGBYO</b>                 | <b>RB</b>                     | <b>RGB</b>                   |
| stomata count per mm <sup>2</sup>               | 226 $\pm$ 54 <sup>a</sup>    | 216 $\pm$ 60 <sup>a</sup>    | 211 $\pm$ 59 <sup>a</sup>     | 228 $\pm$ 55 <sup>a</sup>    |
| length of stomata, $\mu$ m                      | 30.5 $\pm$ 3.9 <sup>b</sup>  | 31.4 $\pm$ 4.3 <sup>ab</sup> | 30.5 $\pm$ 4.5 <sup>b</sup>   | 32.1 $\pm$ 4.8 <sup>a</sup>  |
| width of stomata, $\mu$ m                       | 8.7 $\pm$ 0.9 <sup>a</sup>   | 8.9 $\pm$ 1.0 <sup>a</sup>   | 8.8 $\pm$ 1.0 <sup>a</sup>    | 8.9 $\pm$ 1.1 <sup>a</sup>   |
| chloroplasts, count                             | 7.0 $\pm$ 1.9 <sup>a</sup>   | 7.1 $\pm$ 1.8 <sup>a</sup>   | 7.1 $\pm$ 1.7 <sup>a</sup>    | 6.7 $\pm$ 1.6 <sup>a</sup>   |
| leaf thickness, $\mu$ m                         | 96.3 $\pm$ 13.7 <sup>a</sup> | 98.4 $\pm$ 12.7 <sup>a</sup> | 98 $\pm$ 12.7 <sup>a</sup>    | 96.5 $\pm$ 11.7 <sup>a</sup> |
| stem radius, $\mu$ m                            | 314 $\pm$ 25 <sup>b</sup>    | 346 $\pm$ 36 <sup>a</sup>    | 333 $\pm$ 38 <sup>ab</sup>    | 320 $\pm$ 34 <sup>b</sup>    |
| xylem width, $\mu$ m                            | 49.3 $\pm$ 14.7 <sup>a</sup> | 56.5 $\pm$ 16.5 <sup>a</sup> | 51.4 $\pm$ 11.7 <sup>a</sup>  | 53.6 $\pm$ 13.9 <sup>a</sup> |
| phloem width, $\mu$ m                           | 18.6 $\pm$ 4.6 <sup>b</sup>  | 21.2 $\pm$ 5.1 <sup>a</sup>  | 19.7 $\pm$ 4.4 <sup>ab</sup>  | 20.0 $\pm$ 4.2 <sup>ab</sup> |
| secondary xylem cell wall<br>thickness, $\mu$ m | 1.09 $\pm$ 0.21 <sup>a</sup> | 1.03 $\pm$ 0.24 <sup>a</sup> | 1.02 $\pm$ 0.28 <sup>a</sup>  | 0.98 $\pm$ 0.18 <sup>a</sup> |

FL – fluorescent tubes; RGBYO – red+ green+ blue+ yellow+ orange+ far-red LEDs; RB – red+ blue+ far-red LEDs; RGB – red+ green+ blue+ far-red LEDs. Mean ( $\pm$  standard deviation) are shown. Different letters denote significant differences in estimated marginal mean values among the treatments of each parameter at  $p < 0.05$  according to Tukey's HSD test.

Table S2

**Pearson correlation coefficients among the anatomical proxies of hybrid aspen and silver birch by clone across the studied light treatments at jar level.**

| Silver birch<br>clone No. 40-7 | Stomata<br>length | Stomata<br>width | Number of<br>chloroplast | Leaf<br>thickness | Stomatal<br>density | Stem<br>radius | Xylem<br>width | Phloem<br>width |
|--------------------------------|-------------------|------------------|--------------------------|-------------------|---------------------|----------------|----------------|-----------------|
| Stomata width                  | 0.77              |                  |                          |                   |                     |                |                |                 |
| Number of chloroplast          | 0.04              | 0.06             |                          |                   |                     |                |                |                 |
| Leaf thickness                 | 0.00              | -0.01            | 0.12                     |                   |                     |                |                |                 |
| Stomatal density               | 0.13              | 0.27             | 0.25                     | 0.03              |                     |                |                |                 |
| Stem radius                    | 0.05              | -0.05            | 0.14                     | -0.39             | -0.20               |                |                |                 |
| Xylem width                    | 0.27              | 0.16             | 0.09                     | -0.19             | -0.07               | 0.88           |                |                 |
| Phloem width                   | 0.15              | 0.13             | 0.17                     | -0.37             | -0.07               | 0.94           | 0.90           |                 |
| SXCWT                          | 0.00              | -0.15            | -0.44                    | 0.04              | -0.42               | 0.27           | 0.45           | 0.27            |

  

| Silver birch<br>clone No. 54-257 | Stomata<br>length | Stomata<br>width | Number of<br>chloroplast | Leaf<br>thickness | Stomatal<br>density | Stem<br>radius | Xylem<br>width | Phloem<br>width |
|----------------------------------|-------------------|------------------|--------------------------|-------------------|---------------------|----------------|----------------|-----------------|
| Stomata width                    | 0.66              |                  |                          |                   |                     |                |                |                 |
| Number of chloroplast            | 0.33              | 0.53             |                          |                   |                     |                |                |                 |
| Leaf thickness                   | 0.06              | -0.27            | -0.01                    |                   |                     |                |                |                 |
| Stomatal density                 | -0.39             | -0.33            | -0.29                    | -0.23             |                     |                |                |                 |
| Stem radius                      | 0.30              | 0.22             | 0.00                     | 0.18              | -0.19               |                |                |                 |
| Xylem width                      | 0.32              | 0.09             | 0.04                     | 0.23              | -0.40               | 0.57           |                |                 |
| Phloem width                     | 0.40              | 0.49             | 0.50                     | 0.16              | -0.47               | 0.56           | 0.69           |                 |
| SXCWT                            | 0.46              | 0.49             | 0.43                     | -0.02             | -0.24               | 0.16           | 0.31           | 0.50            |

  

| Silver birch<br>clone No. Pr33 | Stomata<br>length | Stomata<br>width | Number of<br>chloroplast | Leaf<br>thickness | Stomatal<br>density | Stem<br>radius | Xylem<br>width | Phloem<br>width |
|--------------------------------|-------------------|------------------|--------------------------|-------------------|---------------------|----------------|----------------|-----------------|
| Stomata width                  | 0.34              |                  |                          |                   |                     |                |                |                 |
| Number of chloroplast          | 0.04              | -0.23            |                          |                   |                     |                |                |                 |
| Leaf thickness                 | 0.24              | 0.33             | -0.59                    |                   |                     |                |                |                 |
| Stomatal density               | -0.09             | -0.16            | 0.09                     | 0.08              |                     |                |                |                 |
| Stem radius                    | 0.09              | 0.25             | 0.15                     | -0.37             | -0.03               |                |                |                 |
| Xylem width                    | 0.04              | 0.25             | 0.21                     | -0.50             | -0.11               | 0.81           |                |                 |
| Phloem width                   | -0.01             | 0.22             | 0.26                     | -0.51             | -0.27               | 0.83           | 0.90           |                 |
| SXCWT                          | -0.16             | -0.27            | 0.12                     | -0.10             | 0.20                | -0.14          | 0.21           | 0.06            |

Table S2 continued

| Hybrid aspen<br>clone No. 5 | Stomata<br>length | Stomata<br>width | Number of<br>chloroplast | Leaf<br>thickness | Stomatal<br>density | Stem<br>radius | Xylem<br>width | Phloem<br>width |
|-----------------------------|-------------------|------------------|--------------------------|-------------------|---------------------|----------------|----------------|-----------------|
| Stomata width               | -0.08             |                  |                          |                   |                     |                |                |                 |
| Number of chloroplast       | -0.05             | 0.11             |                          |                   |                     |                |                |                 |
| Leaf thickness              | -0.33             | -0.28            | 0.04                     |                   |                     |                |                |                 |
| Stomatal density            | -0.18             | -0.04            | 0.18                     | 0.23              |                     |                |                |                 |
| Stem radius                 | 0.36              | 0.14             | -0.34                    | -0.28             | -0.42               |                |                |                 |
| Xylem width                 | 0.08              | 0.18             | -0.28                    | -0.15             | 0.07                | 0.62           |                |                 |
| Phloem width                | 0.47              | 0.49             | -0.18                    | -0.07             | -0.15               | 0.60           | 0.57           |                 |
| SXCWT                       | -0.42             | -0.23            | 0.75                     | 0.31              | 0.60                | -0.32          | -0.08          | -0.27           |

  

| Hybrid aspen<br>clone No. 28 | Stomata<br>length | Stomata<br>width | Number of<br>chloroplast | Leaf<br>thickness | Stomatal<br>density | Stem<br>radius | Xylem<br>width | Phloem<br>width |
|------------------------------|-------------------|------------------|--------------------------|-------------------|---------------------|----------------|----------------|-----------------|
| Stomata width                | 0.38              |                  |                          |                   |                     |                |                |                 |
| Number of chloroplast        | 0.08              | -0.35            |                          |                   |                     |                |                |                 |
| Leaf thickness               | 0.07              | -0.14            | -0.11                    |                   |                     |                |                |                 |
| Stomatal density             | -0.38             | -0.44            | 0.16                     | 0.12              |                     |                |                |                 |
| Stem radius                  | 0.13              | -0.28            | 0.02                     | -0.01             | 0.10                |                |                |                 |
| Xylem width                  | 0.30              | 0.00             | 0.28                     | 0.16              | -0.22               | 0.13           |                |                 |
| Phloem width                 | 0.00              | -0.25            | 0.49                     | -0.18             | 0.11                | 0.38           | 0.45           |                 |
| SXCWT                        | 0.04              | -0.42            | 0.08                     | -0.04             | -0.10               | 0.46           | 0.03           | 0.20            |

  

| Hybrid aspen<br>clone No. 90 | Stomata<br>length | Stomata<br>width | Number of<br>chloroplast | Leaf<br>thickness | Stomatal<br>density | Stem<br>radius | Xylem<br>width | Phloem<br>width |
|------------------------------|-------------------|------------------|--------------------------|-------------------|---------------------|----------------|----------------|-----------------|
| Stomata width                | 0.09              |                  |                          |                   |                     |                |                |                 |
| Number of chloroplast        | -0.28             | -0.39            |                          |                   |                     |                |                |                 |
| Leaf thickness               | 0.25              | 0.27             | -0.10                    |                   |                     |                |                |                 |
| Stomatal density             | 0.56              | 0.08             | -0.10                    | 0.37              |                     |                |                |                 |
| Stem radius                  | 0.04              | 0.22             | -0.23                    | 0.43              | -0.09               |                |                |                 |
| Xylem width                  | 0.49              | 0.08             | -0.48                    | 0.41              | 0.35                | 0.61           |                |                 |
| Phloem width                 | -0.04             | -0.01            | -0.25                    | 0.14              | -0.10               | 0.50           | 0.41           |                 |
| SXCWT                        | -0.03             | -0.08            | -0.07                    | -0.01             | -0.07               | 0.29           | 0.28           | -0.10           |

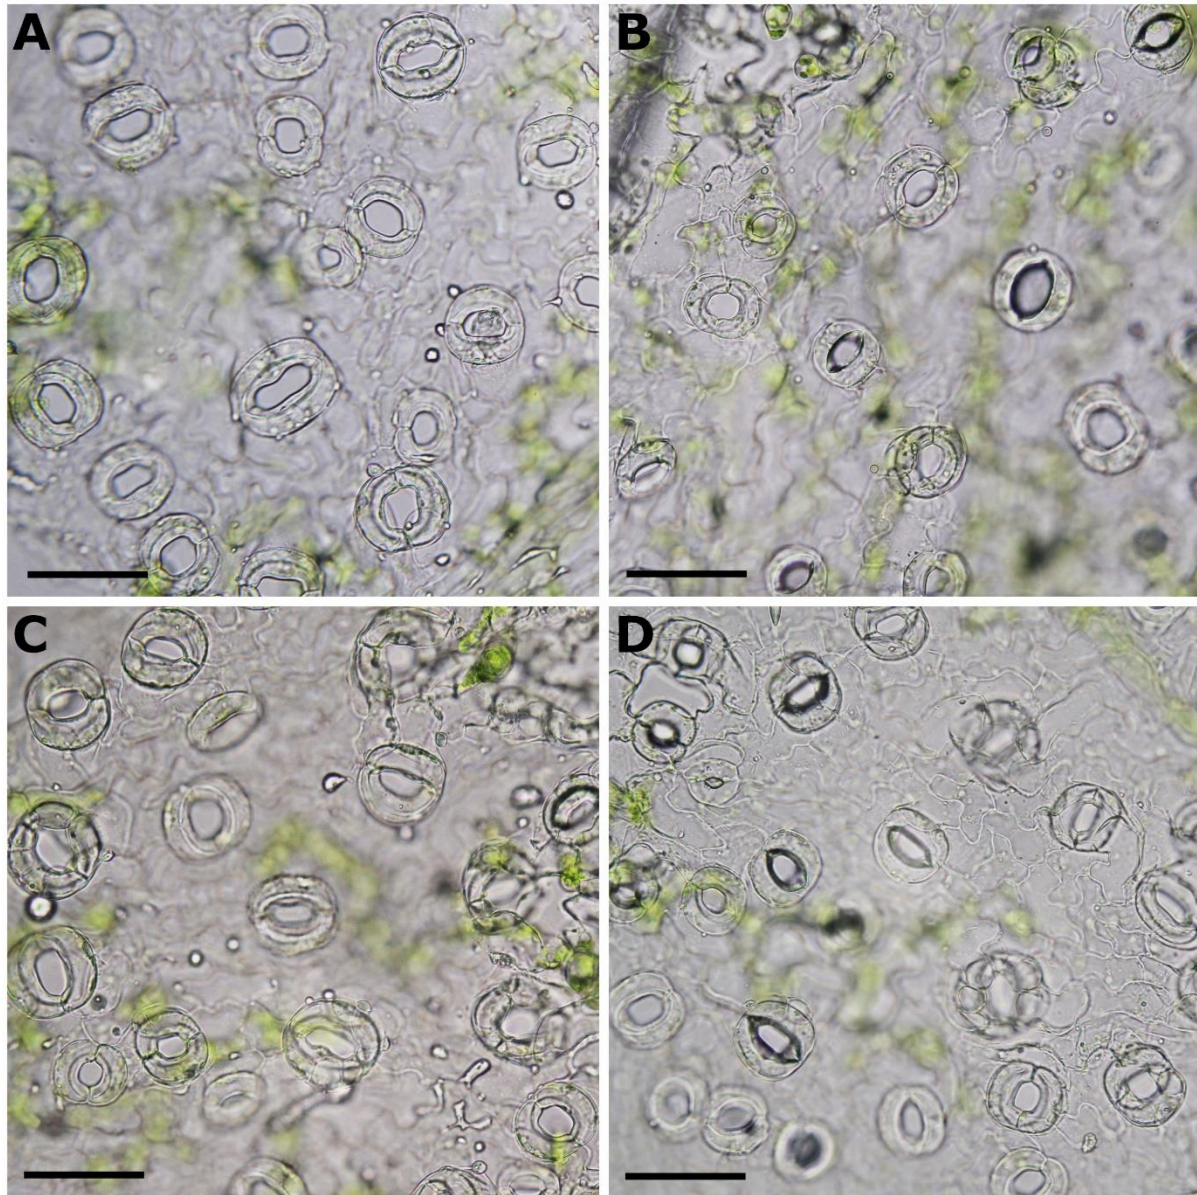

Figure S1. Stomata of silver birch plants grown under different light treatments. FL (A), RB (B), RGB (C) and RGBYO (D). Length of scale cut-off is 50  $\mu\text{m}$ .



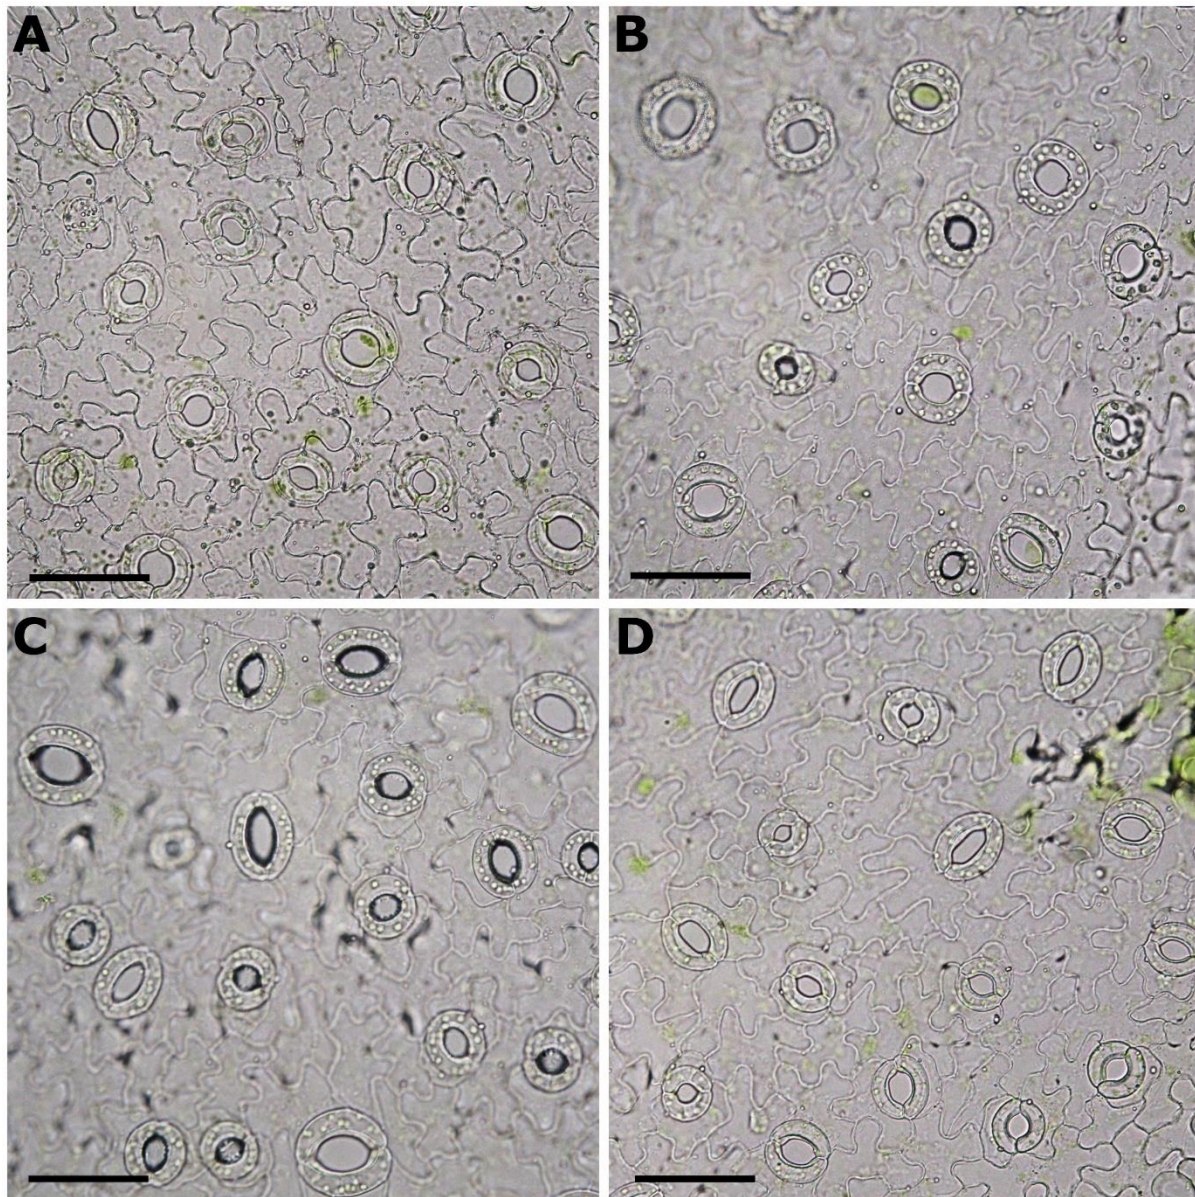

Figure S2. Stomata of hybrid aspen plants grown under different light treatments. FL (A), RB (B), RGB (C) and RGBYO (D). Length of scale cut-off is 50  $\mu\text{m}$ .



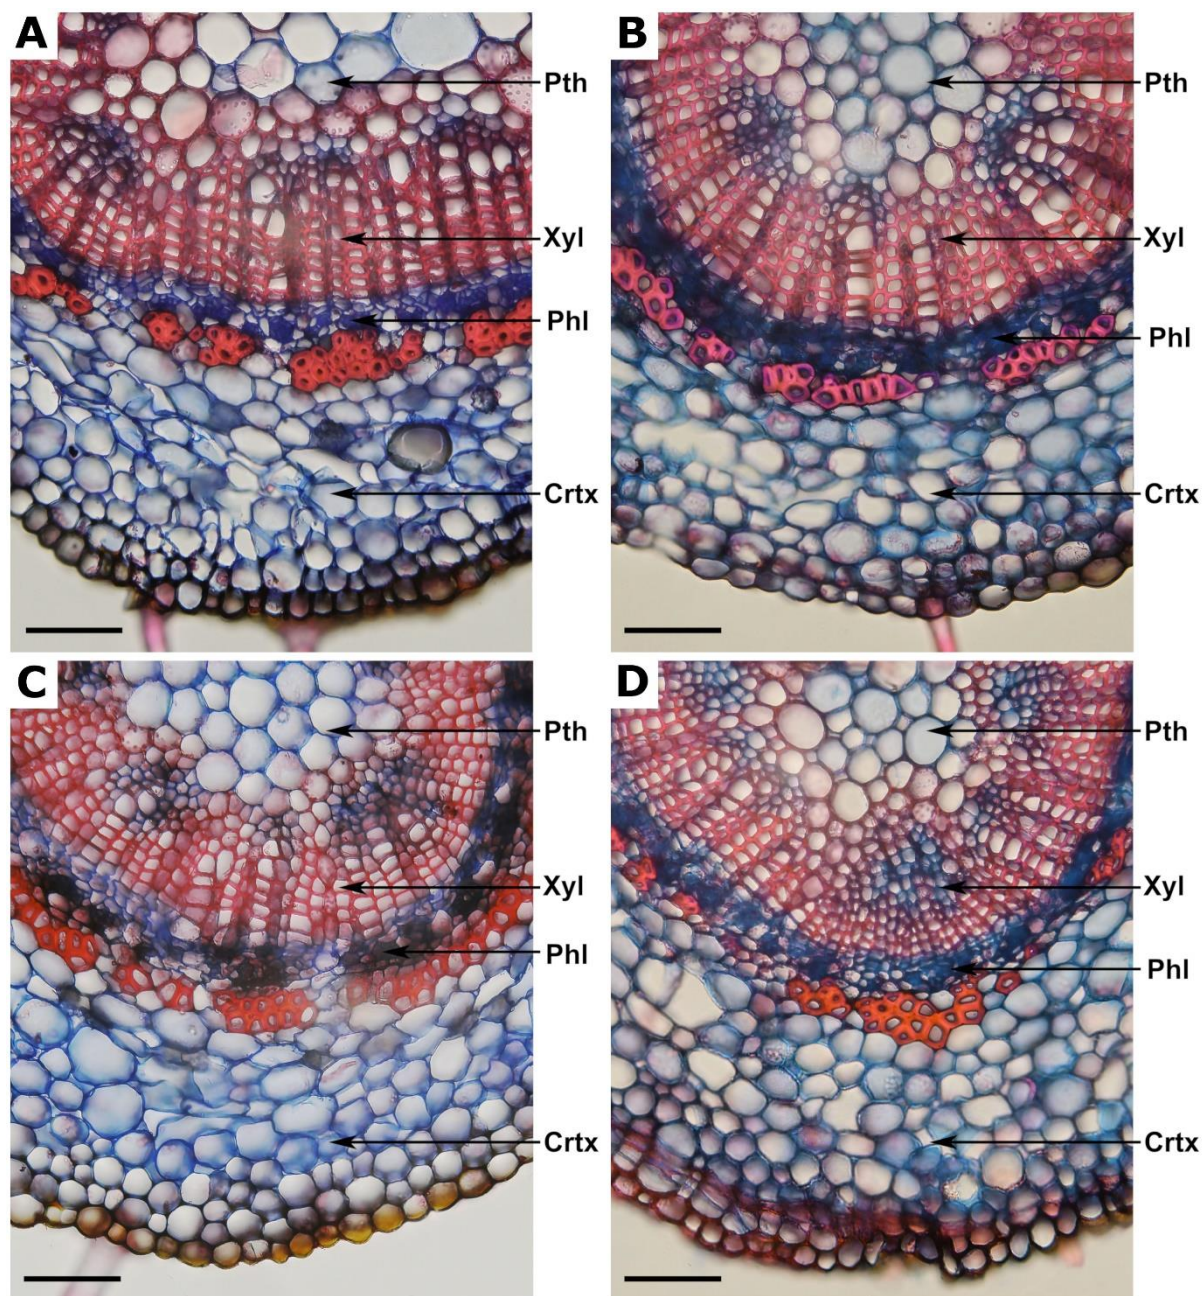

Figure S3. Cross-sections of silver birch *in vitro* plants grown under different light treatments. FL (A), RB (B), RGB (C) and RGBYO (D). Length of scale cut-off is 50  $\mu\text{m}$ . Abbreviations: Pth – pith; Xyl – xylem; Phl – phloem; Crtx – cortex.



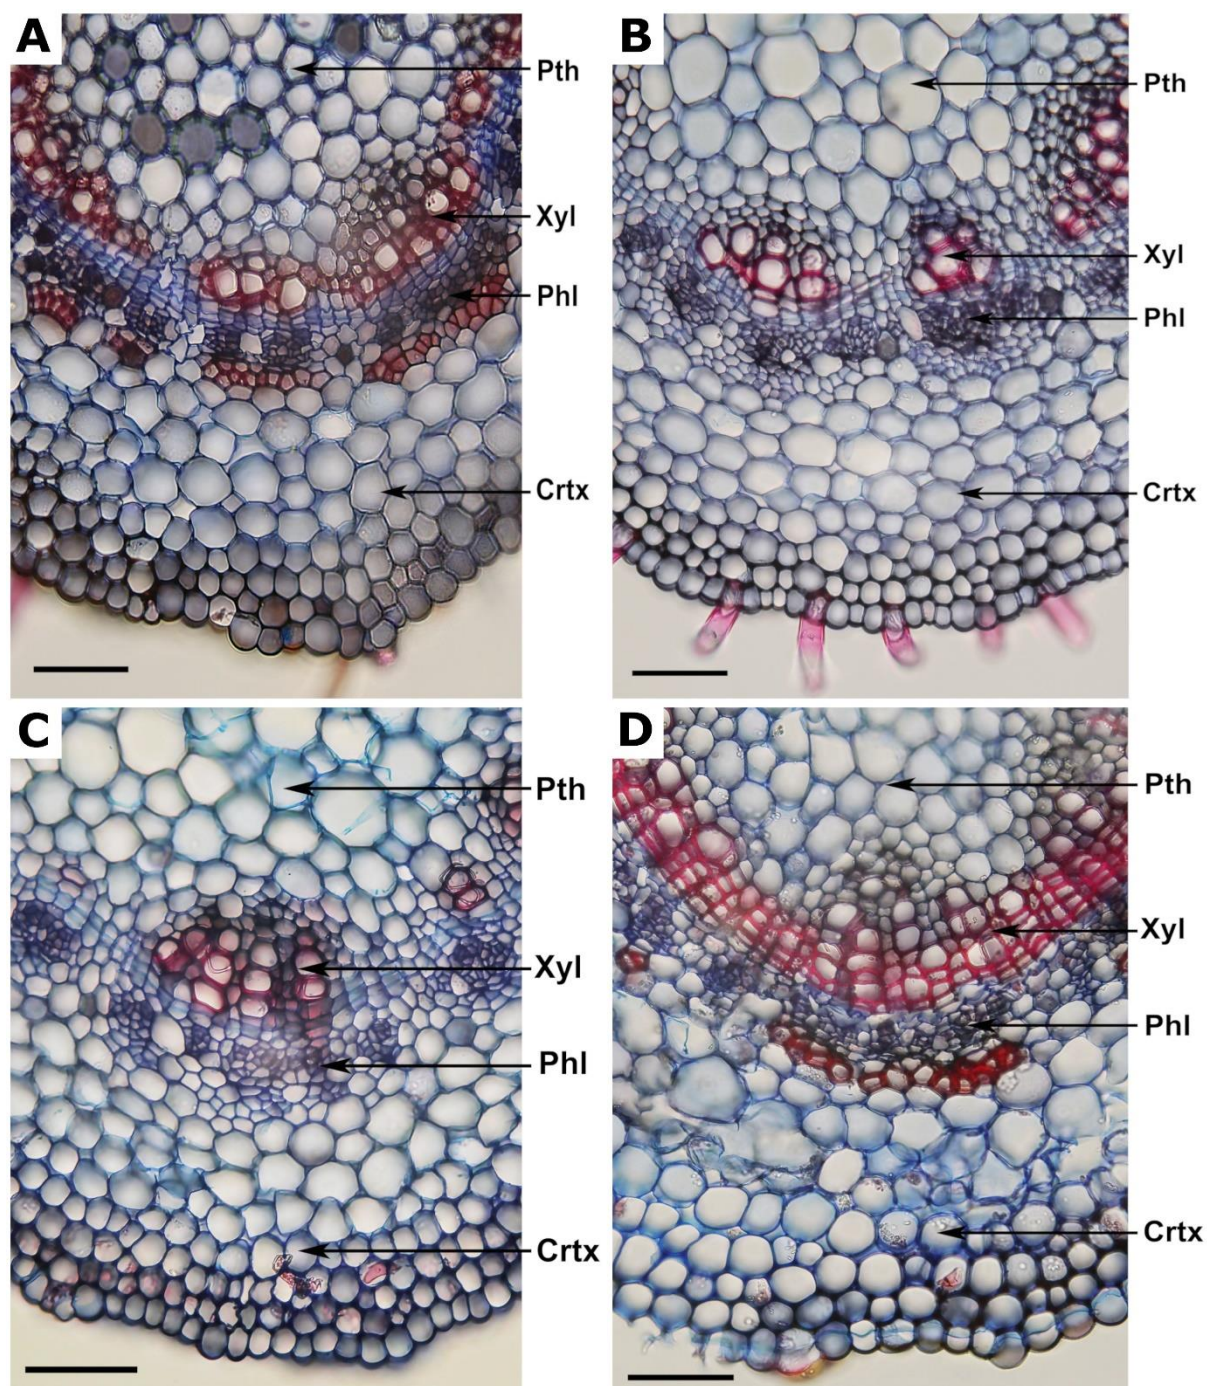

Figure S4. Cross-sections of hybrid aspen *in vitro* plants grown under different light treatments. FL (A), RB (B), RGB (C) and RGBYO (D). Length of scale cut-off is 50 μm. Abbreviations: Pth – pith; Xyl – xylem; Phl – phloem; Crtx – cortex.
